# Supplementary material for: High-performance p-type transparent conducting CuI–Cu2O thin films with enhanced hole mobility, surface, and stability
Source: Royal Society of Chemistry journal article supplement (doi:10.1039/d3tc02422a), 2023-01-01
Supplement: d3tc02422a1.pdf [file d3tc02422a1.pdf]

# High-Performance p-Type Transparent Conducting CuI–Cu<sub>2</sub>O Thin Films with Enhanced Hole Mobility, Surface, and Stability

Ruibin Xue,<sup>a</sup> Gang Gao,\*<sup>a</sup> Lei Yang,<sup>b</sup> Liangge Xu,<sup>a</sup> Yumin Zhang,\*<sup>a</sup> and Jiaqi

Zhu<sup>a,c,d</sup>

<sup>a</sup>National Key Laboratory of Science and Technology on Advanced Composites in  
Special Environments, Harbin Institute of Technology, Harbin 150080, P. R. China

<sup>b</sup>Center of Analysis Measurement, Harbin Institute of Technology, Harbin 150001, P.  
R. China

<sup>c</sup>Zhengzhou Research Institute, Harbin Institute of Technology, Zhengzhou 450046,  
P. R. China

<sup>d</sup>Key Laboratory of Micro-systems and Micro-structures Manufacturing Ministry of  
Education, Harbin Institute of Technology, Harbin 150080, P. R. China

\*Corresponding authors, E-mail addresses: gaogang@hit.edu.cn (Gang Gao),

zhym@hit.edu.cn (Yumin Zhang)

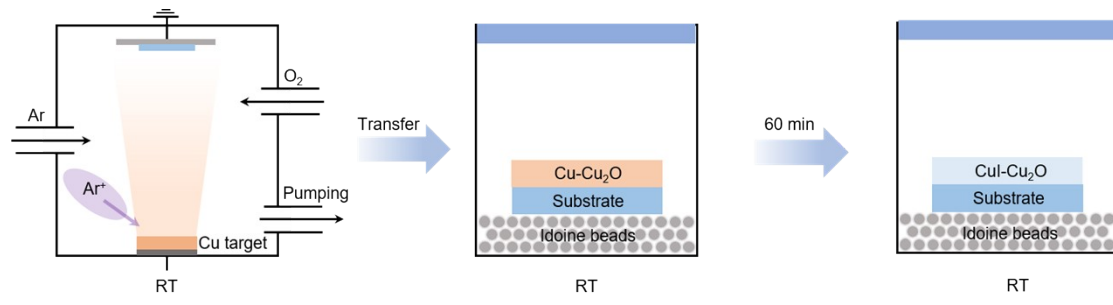

**Figure S1.** Schematic diagram of the CuI-Cu<sub>2</sub>O films deposition process.

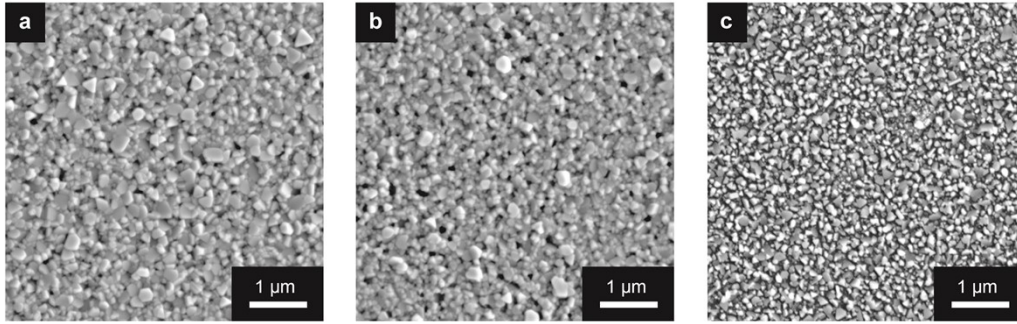

**Figure S2.** SEM images of the CuI–Cu<sub>2</sub>O films after ageing for 6 months under ambient condition with O<sub>2</sub> flow rate of (a) 0 sccm, (b) 0.10 sccm and (c) 0.20 sccm.
